# Supplementary material for: Investigating the development of clouds within marine cold air outbreaks
Source: Copernicus journal article supplement (doi:10.5194/egusphere-2023-734), 2023-05-02
Supplement: Supplementary file 1 [file egusphere-2023-734-supplement.pdf]

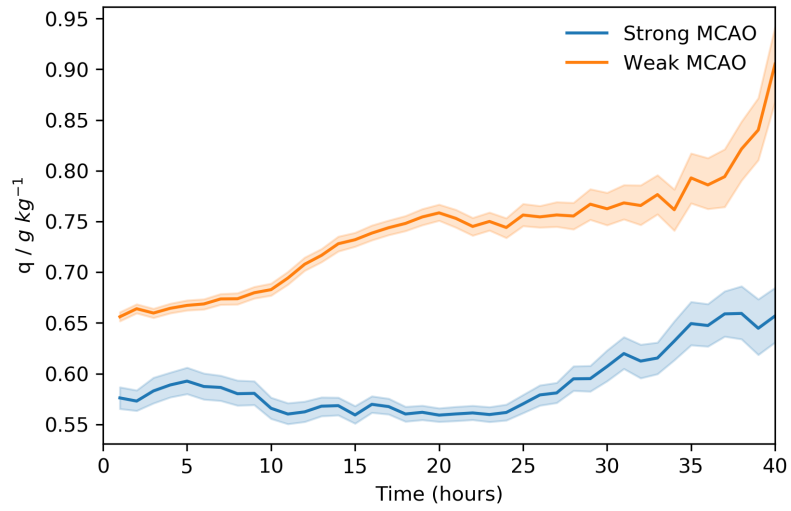

**Figure S1.** The specific humidity at 750 hPa for strong (MCAO > 3.9 K, blue) and weak (0 K < MCAO < 1.5 K, orange) outbreak events moving away from the ice edge.

## References
